# Supplementary material for: The effects of prenatal dietary supplements on blood glucose and lipid metabolism in gestational diabetes mellitus patients: A systematic review and network meta-analysis protocol of randomized controlled trials
Source: PubMed Central journal article supplement (PMC9064104; doi:10.1371/journal.pone.0267854), 2022-05-03
Supplement: pone.0267854.s003.pdf [file pone.0267854.s003.pdf]

**Data abstraction form for meta-analysis (Draft copy)**

**Title: The effects of prenatal dietary supplements on blood glucose and lipid metabolism in gestational diabetes mellitus patients: A systematic review and network meta-analysis protocol of randomized controlled trials**

**Prepared by Dr. Sumanta Saha and Dr. Sujata Saha**

**Instruction to fill this form: Leave no cell empty. If data is unavailable for a cell, enter a hyphen (-) or mention 'NA' (not applicable) in that cell.**

| First author's last name | Year of publication | Title of the study | Outcome | Intervention given in the treatment arm (e.g., vitamin D, no intervention, placebo) | Unit (as reported in the trial; without conversion) | End point mean | Standard deviation (SD) of endpoint mean | Total participants (included in the analysis) | If endpoint mean/SD is unavailable, enter data as reported in the trial | DOI | PMID |
|--------------------------|---------------------|--------------------|---------|-------------------------------------------------------------------------------------|-----------------------------------------------------|----------------|------------------------------------------|-----------------------------------------------|-------------------------------------------------------------------------|-----|------|
|                          |                     |                    |         |                                                                                     |                                                     |                |                                          |                                               |                                                                         |     |      |
|                          |                     |                    |         |                                                                                     |                                                     |                |                                          |                                               |                                                                         |     |      |
|                          |                     |                    |         |                                                                                     |                                                     |                |                                          |                                               |                                                                         |     |      |
|                          |                     |                    |         |                                                                                     |                                                     |                |                                          |                                               |                                                                         |     |      |
|                          |                     |                    |         |                                                                                     |                                                     |                |                                          |                                               |                                                                         |     |      |
|                          |                     |                    |         |                                                                                     |                                                     |                |                                          |                                               |                                                                         |     |      |
|                          |                     |                    |         |                                                                                     |                                                     |                |                                          |                                               |                                                                         |     |      |
|                          |                     |                    |         |                                                                                     |                                                     |                |                                          |                                               |                                                                         |     |      |
|                          |                     |                    |         |                                                                                     |                                                     |                |                                          |                                               |                                                                         |     |      |
|                          |                     |                    |         |                                                                                     |                                                     |                |                                          |                                               |                                                                         |     |      |
|                          |                     |                    |         |                                                                                     |                                                     |                |                                          |                                               |                                                                         |     |      |
|                          |                     |                    |         |                                                                                     |                                                     |                |                                          |                                               |                                                                         |     |      |
|                          |                     |                    |         |                                                                                     |                                                     |                |                                          |                                               |                                                                         |     |      |
|                          |                     |                    |         |                                                                                     |                                                     |                |                                          |                                               |                                                                         |     |      |
|                          |                     |                    |         |                                                                                     |                                                     |                |                                          |                                               |                                                                         |     |      |
|                          |                     |                    |         |                                                                                     |                                                     |                |                                          |                                               |                                                                         |     |      |
|                          |                     |                    |         |                                                                                     |                                                     |                |                                          |                                               |                                                                         |     |      |
|                          |                     |                    |         |                                                                                     |                                                     |                |                                          |                                               |                                                                         |     |      |
|                          |                     |                    |         |                                                                                     |                                                     |                |                                          |                                               |                                                                         |     |      |
|                          |                     |                    |         |                                                                                     |                                                     |                |                                          |                                               |                                                                         |     |      |
|                          |                     |                    |         |                                                                                     |                                                     |                |                                          |                                               |                                                                         |     |      |
